# Supplementary material for: Variation from closed-shell to open shell electronic structures in oligothiophene bis(dioxolene) complexes
Source: Royal Society of Chemistry journal article supplement (doi:10.1039/d3sc02341a), 2023-01-01
Supplement: d3sc02341a1.pdf [file d3sc02341a1.pdf]

# Supporting Information for: Variation from Closed-Shell to Open Shell Electronic Structures in Oligothiophene Bis(dioxolene) Complexes

Paul D. Miller,<sup>1</sup> David A. Shultz,<sup>\*1</sup> Joshua Mengell,<sup>2</sup> Martin L. Kirk,<sup>\*2,3,4</sup> and Lukasz Wojtas<sup>5</sup>

## Table of Contents

|                                                                                         |     |
|-----------------------------------------------------------------------------------------|-----|
| General Experimental                                                                    | S1  |
| Synthesis                                                                               | S1  |
| EPR Spectroscopy                                                                        | S5  |
| Magnetic Susceptibility Experiments                                                     | S6  |
| Electronic Absorption Spectroscopy                                                      | S6  |
| X-Ray Crystallography                                                                   | S6  |
| <sup>1</sup> H NMR Comparison of SQ <sub>2</sub> Th and SQ <sub>2</sub> Th <sub>2</sub> | S14 |

**General.** All chemical reagents were purchased and used as received. Anhydrous and/or degassed solvents were obtained by drying solvent over sieves and purging with nitrogen. MOM<sub>2</sub>CatBpin<sup>1</sup> and Cum<sub>2</sub>MeTpZn(OH)<sup>2</sup> were synthesized according to literature methods. NMR Spectra were recorded on Bruker-400 and Variant-400 spectrometers. Mass spectra were recorded using *Thermo Fisher Scientific Exactive Plus MS*. Absorption spectra were recorded on a Hitachi U-4100 Spectrometer. An Oxford Instruments Optistat CF cryostat was used for all VT-EAS experiments. SQUID magnetometry was performed using a Quantum Design MPMS<sup>®</sup>3 magnetometer with SQUID detection. EPR experiments were conducted on a Bruker X-band EPR.

**Synthesis.** The synthetic scheme for SQ-Th<sub>n</sub>-SQ (n = 0-3) complexes is shown in Scheme S1.

**Scheme S1.** Synthesis of Bis(semiquinone) Biradicals.

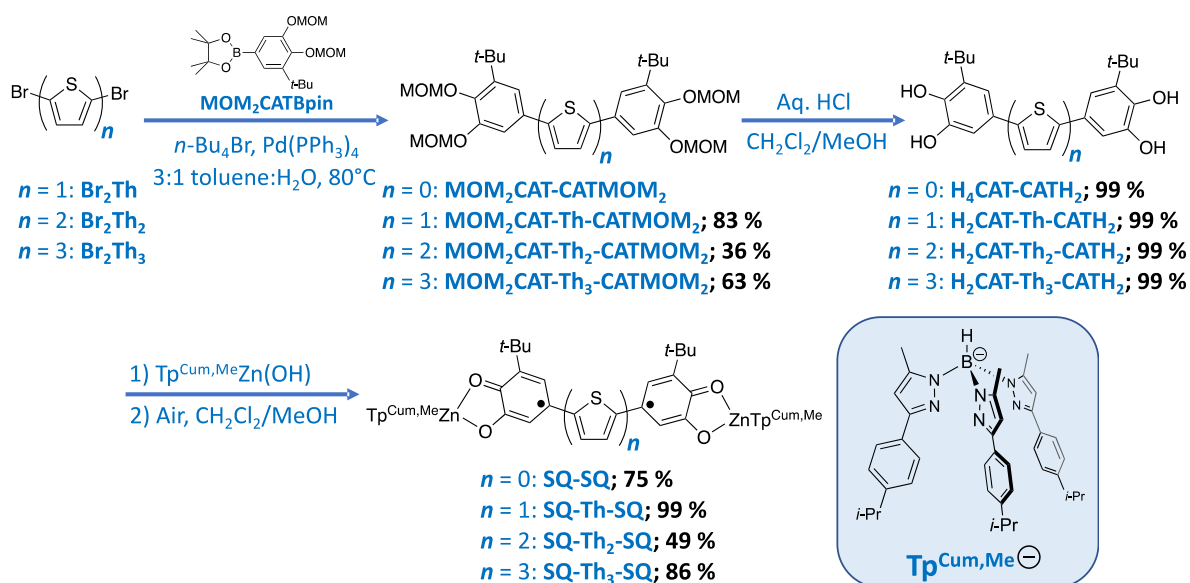

**Scheme S1.** Continued.

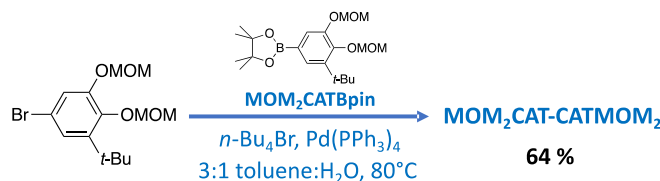

**3,3'-Di-*tert*-butyl-4,4',5,5'-tetrakis(methoxymethyl)-1,1'-biphenyl (MOM<sub>2</sub>Cat-CatMOM<sub>2</sub>).**

MOM<sub>2</sub>CatBr (132 mg, 0.395 mmol), MOM<sub>2</sub>CatBpin (150 mg, 0.395 mmol), Na<sub>2</sub>CO<sub>3</sub> (84 mg, 0.790 mmol), and TBAB (13 mg, 0.04 mmol) were added to a 50 mL RBF equipped with a stir bar. In a glovebox, Pd(PPh<sub>3</sub>)<sub>4</sub> (5 mg, 0.004 mmol) was added to the RBF. Outside the glovebox, 15 mL of dry, degassed toluene and 5 mL of deoxygenated water were added to the flask, a nitrogen flushed condenser was attached, and the reaction was heated to 80 °C and stirred for 16 hours. The reaction was then cooled to room temperature, diluted with Et<sub>2</sub>O, and washed with H<sub>2</sub>O and brine. The organic phase was isolated and dried over MgSO<sub>4</sub>. The organic phase was then filtered and concentrated to yield the crude product which was subsequently purified via column chromatography [Hexanes/Et<sub>2</sub>O [3:1], silica; deactivated with 1% TEA in hexanes; product R<sub>f</sub> = 0.2] to yield **MOM<sub>2</sub>Cat-CatMOM<sub>2</sub>** (127 mg, 64%) as a clear oil. <sup>1</sup>H NMR (400 MHz, CD<sub>2</sub>Cl<sub>2</sub>) δ = 7.14 (s, 4 H), 5.22 (s, 8 H), 3.68 - 3.61 (m, 6 H), 3.55 - 3.47 (m, 6 H), 1.45 (s, 18 H). <sup>13</sup>C NMR (101 MHz, CD<sub>2</sub>Cl<sub>2</sub>) δ = 150.8, 146.1, 144.1, 136.9, 120.0, 114.4, 99.7, 96.2, 58.0, 56.8, 35.8, 30.9; HRMS (TOF MS ES+) *m/z*: [M+H]<sup>+</sup> calcd for [C<sub>28</sub>H<sub>43</sub>O<sub>8</sub>]<sup>+</sup> 507.2958, found 507.2943.

**5,5'-Di-*tert*-butyl-[1,1'-biphenyl]-3,3',4,4'-tetraol (H<sub>4</sub>Cat-CatH<sub>4</sub>).** MOM<sub>2</sub>Cat-CatMOM<sub>2</sub> (55 mg, 0.11 mmol) was dissolved in minimal MeOH in a 10 mL  $\mu$ -wave vial. Two drops of 4 M HCl were added to the vial, which was then capped with a pressure cap and placed in the microwave reactor. The reaction was heated to 90 °C for 5 minutes, then immediately cooled to room temperature with air flow. The solution was then concentrated with Et<sub>2</sub>O trituration to yield **H<sub>4</sub>Cat-CatH<sub>4</sub>** (36 mg, 99%) as a solid. The material was immediately carried over to the next step.

**SQ-SQ (SQ<sub>2</sub>).** H<sub>4</sub>Cat-CatH<sub>4</sub> (36 mg, 0.11 mmol) and Tp<sup>Cum,Me</sup>Zn(OH) (150 mg, 0.217 mmol) were degassed with N<sub>2</sub> in a 50 mL RBF. The solids were then dissolved by N<sub>2</sub> sparged CH<sub>2</sub>Cl<sub>2</sub>/MeOH (1:1) [16 mL] and stirred under N<sub>2</sub> for 15 minutes. The reaction was opened then to air and stirred overnight. The reaction was then concentrated and filtered to isolate a precipitate which was washed with MeOH to yield **SQ-SQ** (150 mg, 75%) as a green solid. X-ray quality crystals were grown in CH<sub>2</sub>Cl<sub>2</sub> layered in MeOH. HRMS (FTMS + pESI) *m/z*: [M+2H]<sup>2+</sup> calcd for [C<sub>98</sub>H<sub>114</sub>B<sub>2</sub>N<sub>12</sub>O<sub>4</sub>Zn<sub>2</sub>]<sup>2+</sup> 842.3963, found 842.3991.

**2,5-Bis(3-(*tert*-butyl)-4,5-bis(methoxymethoxy)phenyl)thiophene (MOM<sub>2</sub>Cat-Th-CatMOM<sub>2</sub>).**

2,5-Dibromothiophene (215 mg/0.100 mL, 0.887 mmol), MOM<sub>2</sub>CatBpin (709 mg, 1.864 mmol), Na<sub>2</sub>CO<sub>3</sub> (376 mg, 3.548 mmol), and tetrabutylammonium bromide (29 mg, 0.09 mmol) were added to an oven dried 50 mL Schlenk flask equipped with a stir bar. The solids were degassed under vacuum and kept under a nitrogen atmosphere. In a glovebox, Pd(PPh<sub>3</sub>)<sub>4</sub> (10 mg, 0.009 mmol) was added to the RBF. Outside the glovebox, 15 mL of dry, degassed toluene and 5 mL of deoxygenated water were added to the flask, a nitrogen flushed condenser was attached, and the reaction was heated to 80 °C and stirred for

48 hours. The reaction was then cooled to room temperature, diluted with Et<sub>2</sub>O, and washed with brine. The organic phase was isolated and dried over sodium sulfate. The organic phase was then filtered and concentrated to yield the crude product which was subsequently purified via column chromatography [Hexanes/EtOAc (6:1), silica; deactivated with 1% TEA in hexanes] to yield **MOM<sub>2</sub>CAT-Th-CATMOM<sub>2</sub>** (456 mg, 87%) as a yellow oil. <sup>1</sup>H NMR (400 MHz, CDCl<sub>3</sub>) δ = 7.28 (d, J = 2.2 Hz, 2 H), 7.27 (d, J = 2.2 Hz, 2 H), 7.17 (s, 2 H), 5.25 (s, 4 H), 5.24 (s, 4 H), 3.68 (s, 6 H), 3.56 (s, 6 H), 1.48 (s, 18 H). <sup>13</sup>C NMR (101 MHz, CDCl<sub>3</sub>) = 150.4, 145.6, 143.8, 143.4, 129.5, 123.6, 118.3, 112.0, 99.1, 95.5, 57.6, 56.4, 35.3, 30.5; HRMS (TOF MS ES<sup>+</sup>) *m/z*: [M+H]<sup>+</sup> calcd for [C<sub>32</sub>H<sub>45</sub>O<sub>8</sub>S]<sup>+</sup> 589.2835, found 589.2820.

**5,5'-(Thiophene-2,5-diyl)bis(3-(*tert*-butyl)benzene-1,2-diol) (H<sub>2</sub>CAT-Th-CATH<sub>2</sub>). MOM<sub>2</sub>CAT-Th-CATMOM<sub>2</sub>** was transferred to a 50 mL RBF, degassed and kept under nitrogen, then redissolved in 15 mL of dry CH<sub>2</sub>Cl<sub>2</sub>/MeOH (2:1). 1 mL of concentrated HCl was added via syringe and the reaction was stirred overnight. Degassed water was added to reaction via syringe and removed via syringe after stirring for 15 minutes. Sodium sulfate was quickly added to the reaction vessel, and the organic phase was transferred to another RBF via canula filtration. Solvent was removed via high vac to yield **H<sub>2</sub>CAT-Th-CATH<sub>2</sub>** (154 mg, 99%) as a blue solid. Material was immediately carried over into the next reaction.

**2,5-SQ<sub>2</sub>-Thiophene (SQ-Th-SQ).** H<sub>2</sub>CAT-Th-CATH<sub>2</sub> (37 mg, 0.090 mmol), Zn(OH)Tp<sup>Cum,Me</sup> (127 mg, 0.184 mmol), and K<sub>2</sub>CO<sub>3</sub> (25 mg, 0.180 mmol) were added to an oven dried round bottom flask and purge pumped three times. The solids were dissolved in 10 mL of CH<sub>2</sub>Cl<sub>2</sub> and 5 mL of MeOH then the solution was left to stir under a nitrogen atmosphere for 24 h. The reaction was then opened to air and left to stir for another 24 h. The resulting suspension was further dried via rotary evaporation, suspended in MeOH, and the precipitate was isolated via filtration. The solid was washed with MeOH and collected with CH<sub>2</sub>Cl<sub>2</sub>, then concentrated under reduced pressure and recrystallized via vapor diffusion of EtOH and CH<sub>2</sub>Cl<sub>2</sub> to afford **SQ<sub>2</sub>Th** (157 mg, 99%) as a purple solid. X-ray quality single crystals were grown by dissolving SQ<sub>2</sub>Th in CH<sub>2</sub>Cl<sub>2</sub> and layering with isopropanol then allowing for slow diffusion to occur. HRMS (TOF MS ES<sup>+</sup>) *m/z*: [M+H]<sup>+</sup> calcd for [C<sub>102</sub>H<sub>117</sub>B<sub>2</sub>N<sub>12</sub>O<sub>4</sub>SZn<sub>2</sub>]<sup>+</sup> 1753.7883, found 1753.7904.

**5,5'-Bis(3-(*tert*-butyl)-4,5-bis(methoxymethoxy)phenyl)-2,2'-bithiophene (MOM<sub>2</sub>CAT-Th<sub>2</sub>-CATMOM<sub>2</sub>).** 5,5'-Dibromo-2,2'-bithiophene (180 mg, 0.745 mmol), MOM<sub>2</sub>CatBpin (595 mg, 1.565 mmol), Na<sub>2</sub>CO<sub>3</sub> (316 mg, 2.98 mmol), and TBAB (24 mg, 0.075 mmol) were added to a 50 mL RBF equipped with a stir bar. In a glovebox, Pd(PPh<sub>3</sub>)<sub>4</sub> (9 mg, 0.008 mmol) was added to the RBF. Outside the glovebox, 15 mL of dry, degassed toluene and 5 mL of deoxygenated water were added to the flask, a nitrogen flushed condenser was attached, and the reaction was heated to 80 °C and stirred for 48 hours. The reaction was then cooled to room temperature, diluted with Et<sub>2</sub>O, and washed with brine. The organic phase was isolated and dried over sodium sulfate. The organic phase was then filtered and concentrated to yield the crude product which was subsequently purified via column chromatography [Hexanes/EtOAc (5:1), silica; deactivated with 1% TEA in hexanes] to yield the desired compound (376 mg, 75%) as a bright yellow solid. <sup>1</sup>H NMR (400 MHz, CDCl<sub>3</sub>) δ = 7.28 (d, J = 2.1 Hz, 2 H), 7.25 (d, J = 2.1 Hz, 2 H), 7.15 (d, J = 3.8 Hz, 2 H), 7.14 (d, J = 3.8 Hz, 2 H), 5.24 (s, 8 H), 3.68 (s, 6 H), 3.56 (s, 6 H), 1.48 (s, 18 H). <sup>13</sup>C NMR (101 MHz, CDCl<sub>3</sub>) δ = 150.5, 145.8, 143.9, 143.2, 136.4, 129.1, 124.2, 123.4, 118.3, 112.1, 99.1, 95.5, 57.6, 56.4, 35.3, 30.5; HRMS (TOF MS ES<sup>+</sup>) *m/z*: [M+H]<sup>+</sup> calcd for [C<sub>36</sub>H<sub>46</sub>O<sub>8</sub>S<sub>2</sub>]<sup>+</sup> 670.2634, found 670.2629.

**5,5'-([2,2'-Bithiophene]-5,5'-diyl)bis(3-(*tert*-butyl)benzene-1,2-diol) (H<sub>2</sub>CAT-Th<sub>2</sub>-CATH<sub>2</sub>).** MOM<sub>2</sub>CAT-Th<sub>2</sub>-CATMOM<sub>2</sub> (93 mg, 0.14 mmol) was transferred to a 50 mL RBF, degassed and kept under nitrogen, then redissolved in 25 mL of dry CH<sub>2</sub>Cl<sub>2</sub>/MeOH (3:2). 2 mL of concentrated HCl was added via syringe and the reaction was stirred overnight. The next day the reaction was diluted with Et<sub>2</sub>O, washed

with brine, dried over sodium sulfate, and concentrated under reduced pressure to afford **H<sub>2</sub>CAT-Th-CATH<sub>2</sub>** (69 mg, 99%) as a dark yellow solid. Material was immediately carried over into the next reaction.

**5,5'-SQ<sub>2</sub>-Bithiophene (SQ-Th<sub>2</sub>-SQ).** **H<sub>2</sub>CAT-Th<sub>2</sub>-CATH<sub>2</sub>** (69 mg, 0.14 mmol), Zn(OH)Tp<sup>Cum,Me</sup> (197 mg, 0.29 mmol), and K<sub>2</sub>CO<sub>3</sub> (38 mg, 0.278 mmol) were added to an oven dried round bottom flask and purge pumped three times. The solids were dissolved in 10 mL of CH<sub>2</sub>Cl<sub>2</sub> and 5 mL of MeOH then the solution was left to stir under a nitrogen atmosphere for 24 h. The reaction was then opened to air and left to stir for another 24 h. The resulting suspension was further dried via rotary evaporation, slurried in MeOH, then the precipitate was isolated via filtration. The solid was washed with MeOH and collected with CH<sub>2</sub>Cl<sub>2</sub>, then concentrated under reduced pressure to afford **SQ-Th<sub>2</sub>-SQ** (126 mg, 49%) as a dark green solid. X-ray quality crystals were grown in CH<sub>2</sub>Cl<sub>2</sub> layered with EtOH. HRMS (TOF MS, ES<sup>+</sup>) *m/z*: [M+H]<sup>+</sup> calcd for [C<sub>106</sub>H<sub>119</sub>B<sub>2</sub>N<sub>12</sub>O<sub>4</sub>S<sub>2</sub>Zn<sub>2</sub>]<sup>+</sup> 1835.7760, found 1835.7644.

**5,5''-Bis(3-(*tert*-butyl)-4,5-bis(methoxymethoxy)phenyl)-2,2':5',2''-terthiophene (MOM<sub>2</sub>CAT-Th<sub>3</sub>-CATMOM<sub>2</sub>).** 5,5''-Dibromoterthiophene (270 mg, 0.664 mmol), MOM<sub>2</sub>CatBpin (530 mg, 1.394 mmol), Na<sub>2</sub>CO<sub>3</sub> (282 mg, 2.656 mmol), and tetrabutylammonium bromide (23 mg, 0.07 mmol) were added to an oven dried 50 mL Schlenk flask equipped with a stir bar. The solids were degassed under vacuum and kept under a nitrogen atmosphere. In a glovebox, Pd(PPh<sub>3</sub>)<sub>4</sub> (8 mg, 0.007 mmol) was added to the RBF. Outside the glovebox, 15 mL of dry, degassed toluene and 5 mL of deoxygenated water were added to the flask, a nitrogen flushed condenser was attached, and the reaction was heated to 80 °C and stirred for 48 hours. The reaction was then cooled to room temperature, diluted with Et<sub>2</sub>O, and washed with brine. The organic phase was isolated and dried over sodium sulfate. The organic phase was then filtered and concentrated to yield the crude product which was subsequently purified via column chromatography (Hexanes/EtOAc (4:1), silica; deactivated with 1% TEA in hexanes) to yield 10 (440 mg, 88%) as an orange solid. <sup>1</sup>H NMR (400 MHz, CDCl<sub>3</sub>) δ = 7.29 - 7.27 (d, J = 2.1 Hz, 2 H), 7.25 (d, J = 2.1 Hz, 2 H), 7.17 - 7.12 (m, 4 H), 7.11 (s, 2 H), 5.24 (s, 8 H), 3.68 (s, 6 H), 3.56 (s, 6 H), 1.47 (s, 18 H); <sup>13</sup>C NMR (101 MHz, CDCl<sub>3</sub>) δ = 150.5, 145.8, 143.9, 143.4, 136.1, 135.9, 129.0, 124.4, 124.1, 123.5, 118.2, 112.0, 99.1, 95.5, 77.4, 77.1, 76.7, 57.6, 56.4, 35.3, 35.1, 30.5, 30.4, 24.8; HRMS (TOF MS, ES<sup>+</sup>) *m/z*: [M+H]<sup>+</sup> calcd for [C<sub>40</sub>H<sub>49</sub>O<sub>8</sub>S<sub>3</sub>]<sup>+</sup> 753.2590, found 753.2554.

**5,5'-([2,2':5',2''-Terthiophene]-5,5''-diyl)bis(3-(*tert*-butyl)benzene-1,2-diol) (H<sub>2</sub>CAT-Th<sub>3</sub>-CATH<sub>2</sub>).** MOM<sub>2</sub>CAT-Th<sub>3</sub>-CATMOM<sub>2</sub> (315 mg; 0.418 mmol) was transferred to a 50 mL RBF, degassed and kept under nitrogen, then dissolved in 25 mL of dry CH<sub>2</sub>Cl<sub>2</sub>/MeOH (3:2). HCl (2 mL) was added via syringe and the reaction was stirred overnight. The next day the reaction was diluted with Et<sub>2</sub>O, washed with brine, dried over sodium sulfate, and concentrated under reduced pressure to afford **H<sub>2</sub>CAT-Th<sub>3</sub>-CATH<sub>2</sub>** (235 mg, 99%) as a dark yellow solid. Material was immediately carried over into the next reaction.

**5,5''-SQ<sub>2</sub>-Terthiophene (SQ-Th<sub>3</sub>-SQ).** **H<sub>2</sub>CAT-Th<sub>3</sub>-CATH<sub>2</sub>** (79 mg, 0.141 mmol), Zn(OH)Tp<sup>Cum,Me</sup> (195 mg, 0.282 mmol), and K<sub>2</sub>CO<sub>3</sub> (195 mg, 0.282 mmol) were added to an oven dried round bottom flask and purge pumped three times. The solids were dissolved in 15 mL of CH<sub>2</sub>Cl<sub>2</sub> and 5 mL of MeOH then the solution was left to stir under a nitrogen atmosphere for 24 h. The reaction was then opened to air and left to stir for another 24 h. The resulting suspension was further dried via rotary evaporation, slurried in MeOH, then the precipitate was isolated via filtration. The solid was washed with MeOH to afford pure **SQ-Th<sub>3</sub>-SQ** (232 mg, 86%) as a dark red solid. X-ray quality crystals were grown in chloroform layered with MeOH. HRMS (TOF MS, ES<sup>+</sup>) *m/z*: [M+2H]<sup>2+</sup> calcd for [C<sub>110</sub>H<sub>122</sub>B<sub>2</sub>N<sub>12</sub>O<sub>4</sub>S<sub>3</sub>Zn<sub>2</sub>]<sup>2+</sup> 1918.7716, found 1918.7524.

**Electron Paramagnetic Resonance Spectroscopy.** EPR spectra were recorded on a Brüker ELEXSYS-II E500 CW EPR spectrometer with low temperature capabilities. For SQ<sub>2</sub>Th<sub>3</sub>, ca. 2 mM in biradical (frozen solution experiments) were prepared in freshly distilled 2-methyl-tetrahydrofuran, degassed, and the spectra collected in quartz EPR tubes. For SQ<sub>2</sub>Th<sub>2</sub>, ca. 2 mM solution of biradical was made in a saturated solution of poly(vinyl)chloride in CH<sub>2</sub>Cl<sub>2</sub>. This biradical/polymer solution was pipetted onto a glass surface evenly, then covered with a watch glass to allow for slow evaporation. The resulting biradical infused polymer film was used for all SQ<sub>2</sub>Th<sub>2</sub> EPR experiments.

All triplet powder spectra collected with fit utilizing EasySpin, a computational EPR package based in MatLab.<sup>3</sup> See below Tables E1 and E2 for the fitting parameters used to fit SQ<sub>2</sub>Th<sub>2</sub> and SQ<sub>2</sub>Th<sub>3</sub> powder spectra, respectively.

| <b>Table E1: SQ<sub>2</sub>Th<sub>2</sub> EasySpin Fitting Parameters</b> |                         |                |
|---------------------------------------------------------------------------|-------------------------|----------------|
| <b>Parameter</b>                                                          | <b>Doublet Impurity</b> | <b>Triplet</b> |
| $g_x$                                                                     | 2.0049                  | 2.0056         |
| $g_y$                                                                     | 2.0049                  | 2.0030         |
| $g_z$                                                                     | 2.0049                  | 2.0073         |
| Line Width (Gaussian)                                                     | 0.08                    | 0.16           |
| Line Width (Lorentzian)                                                   | 0.97                    | 0.76           |
| Weight                                                                    | 0.34                    | 0.66           |
| D [cm <sup>-1</sup> ]                                                     | -                       | 0.0058         |
| E [cm <sup>-1</sup> ]                                                     | -                       | 0.0009         |
| $g_x$ Strain                                                              | -                       | 2.40E-06       |
| $g_y$ Strain                                                              | -                       | 0.0128         |
| $g_z$ Strain                                                              | -                       | 0.0140         |

| <b>Table E2: SQ<sub>2</sub>Th<sub>3</sub> EasySpin Fitting Parameters</b> |                         |                |
|---------------------------------------------------------------------------|-------------------------|----------------|
| <b>Parameter</b>                                                          | <b>Doublet Impurity</b> | <b>Triplet</b> |
| $g_x$                                                                     | 2.0058                  | 2.0055         |
| $g_y$                                                                     | 2.0036                  | 2.0029         |
| $g_z$                                                                     | 2.0057                  | 2.0061         |
| Line Width (Gaussian)                                                     | 0.51                    | 0.51           |
| Line Width (Lorentzian)                                                   | 0.16                    | 0.0043         |
| Weight                                                                    | 0.36                    | 0.64           |
| D [cm <sup>-1</sup> ]                                                     | -                       | 0.00342        |
| E [cm <sup>-1</sup> ]                                                     | -                       | 0.00062        |
| $g_x$ Strain                                                              | -                       | 0              |
| $g_y$ Strain                                                              | -                       | 0.0025         |
| $g_z$ Strain                                                              | -                       | 0.0043         |

**Magnetic Susceptibility and Magnetization Measurements.** Magnetic susceptibility measurements were collected on a Quantum Design MPMS-XL7 SQUID magnetometer with an applied field of 0.7 T. A crystalline sample (~20 mg) was loaded into a gel cap/straw sample holder and mounted to the sample rod with Kapton tape for variable temperature measurements. Raw data were corrected with Pascal's constants as a first approximation for molecular diamagnetism followed by a straight line correction to all data for the diamagnetic response of sample container where the slope of the line represents the residual diamagnetic correction. The magnetic susceptibility data were fit using a field-independent van Vleck

expression,  $\chi_{\text{eff}}T = [\chi/(1-\theta\chi)]T$ , where  $\theta = \frac{2zJ'_{\text{inter}}}{Ng^2\beta^2}$ , and  $\chi = \frac{0.75g^2}{3 + \exp\left(\frac{-2J_{\text{SQ-SQ}}}{0.695 \cdot T}\right)}$ , and  $J_{\text{SQ-SQ}}$  is the SQ-Bridge-SQ magnetic exchange parameter.<sup>4</sup> The origin of  $zJ'_{\text{inter}}$  may be zero-field splitting, intermolecular interactions, saturation effects, or some combination of all three.<sup>4, 5</sup> In our data, the effects of  $zJ'_{\text{inter}}$  are negligible compared to  $J_{\text{SQ-B-SQ}}$ , and varying results in 10-15% changes in  $J_{\text{SQ-B-SQ}}$ , which is insufficient to alter either our discussion or conclusions. In fact, by omitting the  $\chi_{\text{para}} \cdot T$  data points below 10K, the data can be fit adequately without the  $zJ'_{\text{inter}}$  term. Typically, the small deviation of the  $g$ -values (as a fit parameter) from the expected spin-only value of ~2.00 can be the result of minute (~1%) weighing errors. We note that excellent fits could be obtained without including any “ $J$ -strain,” which suggests that thermal (de)population of vibrational/torsional levels has no effect on the magnetic data, in accord with our published results on other SQ-Bridge-NN molecules. Finally, shown below in **Figure S1** is the SQUID data collected for **SQ<sub>2</sub>Th** on a crystalline sample, which possesses diamagnetic properties between 5 to 300 K by SQUID.

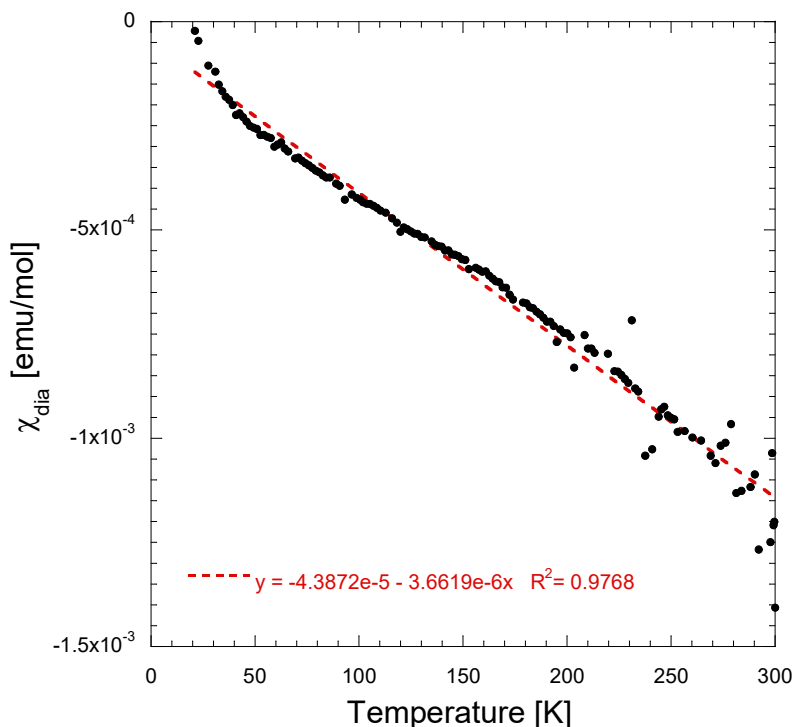

**Figure S1.** Diamagnetic susceptibility plot of **SQ<sub>2</sub>Th** collected by SQUID magnetometry. As shown, the data fits to a linear fit with a negative slope, indicative of diamagnetism within 5 to 300 K. Attempts at fitting this to the HDVV Hamiltonian yielded no fits that would reasonably indicate paramagnetism.

### Electronic Absorption Spectroscopy.

An Oxford Instruments Optistat CF Cryostat was suspended in a Hitachi U-4100 Spectrometer such that the optical windows of the cryostat were centered with respect to the beam path. The background was set then, accounting for the baseline contribution from the windows. Each polystyrene thin film was secured to the end of the sample rod and inserted into the cryostat sample chamber which was then pumped and purged with helium gas. Variable Temperature EAS (4-250K) was performed for all  $\text{SQ}_2\text{-Th}_n$  samples ( $n = 1\text{-}3$ ). Strong temperature dependent effects were observed for  $\text{SQ}_2\text{-Th}_3$ , exhibiting multiple isosbestic points, and slight peak intensity variation for  $\text{SQ}_2\text{-Th}_2$ .

In corroboration with the observed magnetic exchange coupling in  $\text{SQ}_2\text{-Th}_3$ , its temperature dependent behavior was rationalized as arriving from thermal population of the accessible singlet and triplet states. The peak intensity of the most intense peaks that are increasing and decreasing with temperature were plotted and normalized iteratively to obtain best fits to the Boltzmann population equation for each state with a single  $J$  (2J energy gap) value,  $-111\text{ cm}^{-1}$ . This result shows good correlation with the value measured from magnetic susceptibility, with deviations likely arising from the differing medium. The spectra of the individual singlet and triplet states were obtained after the realization that at 4K only the singlet state is populated, giving the spectra of the singlet. The singlet spectra was subtracted from the high temperature spectrum weighted by the Boltzmann population determined with the fit  $J$  value, the resultant spectra was renormalized with respect to the baseline and represents that of the triplet. As a proof of concept, a range of the VT spectra were reassembled by adding together the component spectra weighted by their predicted Boltzmann populations with remarkable agreement.

The decrease in peak intensity with respect to temperature in  $\text{SQ}_2\text{-Th}_2$  was initially shelved. After VT EPR and magnetic susceptibility data were obtained and attempts to fit them to a single  $J$ -value with a two-state model failed, it was observed that the temperature dependent behavior was observed at a temperature lower than the triplet was occupied as determined by EPR. This combined with our hypothesis of the nature of the changes in the state diagram as a function of Th bridge units lead to the introduction of a three-state model, two singlets and a triplet highest in energy. The absorption peak intensity as a function of temperature and VT EPR intensity were simultaneously fit with identical energy gaps and appropriate expressions for each technique and the relevant state (equations 4 and 5 in text). These energy gaps ( $306, 822\text{ cm}^{-1}$ ) were in good agreement with those determined by fitting the susceptibility to a similar three-state model ( $317, 959\text{ cm}^{-1}$ . Equation 3).

### Single Crystal X-ray Diffraction.

A dark purple/green plate-like specimen of  $\text{C}_{102}\text{H}_{116}\text{B}_2\text{N}_{12}\text{O}_4\text{SZn}_2$  ( $\text{SQ}_2\text{Th}/\text{SQ}_2\text{Th}$ ) with approximate dimensions  $0.23\text{ mm} \times 0.102\text{ mm} \times 0.081\text{ mm}$ , was used for X-ray crystallographic analysis. X-ray diffraction data were measured on Bruker D8 Venture PHOTON II CPAD diffractometer equipped with a Cu  $K\alpha$  INCOATEC ImuS micro-focus source ( $\lambda = 1.54178\text{ \AA}$ ). Indexing was performed using APEX4<sup>6</sup> (Difference Vectors method). Data integration and reduction were performed using SaintPlus.<sup>7</sup> Absorption correction was performed by multi-scan method implemented in SADABS.<sup>8</sup> Space group was determined using XPREP implemented in APEX3.<sup>6</sup> Structure was solved using SHELXT<sup>9</sup> and refined using SHELXL-2018/3<sup>10</sup> (full-matrix least-squares on F2) through OLEX2 interface program.<sup>11</sup> Ellipsoid plot was made with Platon.<sup>12</sup> Disordered parts of  $\text{SQ}_2\text{Th}$  molecule and disordered solvent molecules were refined with restraints. Due to disorder, it was not possible to reliably model hydrogen atoms of isopropanol -OH

groups. The exact amount and orientation of heavily disordered solvent molecules are TENTATIVE! Data and refinement conditions are shown in Table S1, and structure shown in Figure S1.

A dark green plate-like specimen of  $C_{106}H_{118}B_2N_{12}O_4S_2Zn_2$  ( $SQ_2Th_2/SQ_2Th_2$ ) with approximate dimensions 0.506 mm x 0.251 mm x 0.098 mm, was used for X-ray crystallographic analysis. X-ray diffraction data were measured on Bruker D8 Venture PHOTON II CPAD diffractometer equipped with a Cu K $\alpha$  INCOATEC ImuS micro-focus source ( $\lambda = 1.54178 \text{ \AA}$ ). Indexing was performed using APEX4<sup>6</sup> (Difference Vectors method). Data integration and reduction were performed using SaintPlus.<sup>7</sup> Absorption correction was performed by multi-scan method implemented in SADABS.<sup>8</sup> Space group was determined using XPREP implemented in APEX3.<sup>6</sup> Structure was solved using SHELXT<sup>9</sup> and refined using SHELXL-2018/3<sup>10</sup> (full-matrix least-squares on F2) through OLEX2 interface program.<sup>11</sup> Ellipsoid plot was made with Platon.<sup>12</sup> Disordered solvent molecules were refined with restraints. Due to disorder, it was not possible to reliably model hydrogen atoms of water molecule. The exact amount and orientation of heavily disordered solvent molecules are TENTATIVE! Data and refinement conditions are shown in Table S2, and structure shown in Figure S2.

A dark red plate-like specimen of  $C_{110}H_{120}B_2N_{12}O_4S_3Zn_2$  (PDM3-57/ $SQ_2Th_3$ ) with approximate dimensions 0.33 mm x 0.2 mm x 0.1 mm, was used for X-ray crystallographic analysis. data for sample  $SQ_2Th_3$  were measured on Bruker D8 Venture PHOTON II CPAD diffractometer equipped with a Cu K $\alpha$  INCOATEC ImuS micro-focus source ( $\lambda = 1.54178 \text{ \AA}$ ). Indexing was performed using APEX4<sup>6</sup> (Difference Vectors method). Data integration and reduction were performed using SaintPlus.<sup>7</sup> Absorption correction was performed by multi-scan method implemented in SADABS.<sup>8</sup> Space group was determined using XPREP implemented in APEX3.<sup>6</sup> Structure was solved using SHELXT<sup>9</sup> and refined using SHELXL-2018/3<sup>10</sup> (full-matrix least-squares on F2) through OLEX2 interface program.<sup>11</sup> Ellipsoid plot was done with Platon.<sup>12</sup> Chloroform molecules are severely disordered, and it was not possible to locate all disordered atoms. The exact amount and positions of chloroform molecules are tentative. Disordered atoms of chloroform and main molecule were refined with restraints. All hydrogen atoms were refined using riding model. Data and refinement conditions are shown in Table S3, and structure (with and without disordered solvent) shown in Figure S3.

**Table S1 Crystal data and structure refinement for SQ2Th.**

|                                                |                                                                                                   |
|------------------------------------------------|---------------------------------------------------------------------------------------------------|
| Identification code                            | SQ2Th                                                                                             |
| Empirical formula                              | $C_{108.27}H_{130.18}B_2Cl_{2.73}N_{12}O_{5.63}SZn_2$                                             |
| Moiety formula                                 | $C_{102}H_{116}B_2N_{12}O_4SZn_2$ ,<br>1.635( $C_3H_7O_{[Isopropanol]}$ ),<br>1.364( $CH_2Cl_2$ ) |
| Formula weight                                 | 1971.01                                                                                           |
| Temperature/K                                  | 100.00                                                                                            |
| Crystal system                                 | triclinic                                                                                         |
| Space group                                    | P-1                                                                                               |
| a/Å                                            | 12.3174(6)                                                                                        |
| b/Å                                            | 13.2142(6)                                                                                        |
| c/Å                                            | 33.891(2)                                                                                         |
| $\alpha/^\circ$                                | 98.9882(12)                                                                                       |
| $\beta/^\circ$                                 | 92.331(2)                                                                                         |
| $\gamma/^\circ$                                | 98.306(2)                                                                                         |
| Volume/Å <sup>3</sup>                          | 5380.1(5)                                                                                         |
| Z                                              | 2                                                                                                 |
| $\rho_{calc}/cm^3$                             | 1.217                                                                                             |
| $\mu/mm^{-1}$                                  | 1.795                                                                                             |
| F(000)                                         | 2083.0                                                                                            |
| Crystal size/mm <sup>3</sup>                   | 0.23 × 0.102 × 0.081                                                                              |
| Radiation                                      | CuK $\alpha$ ( $\lambda = 1.54178$ )                                                              |
| 2 $\Theta$ range for data collection/ $^\circ$ | 5.29 to 159.724                                                                                   |
| Index ranges                                   | -15 ≤ h ≤ 15, -16 ≤ k ≤ 16, -43 ≤ l ≤ 43                                                          |
| Reflections collected                          | 157498                                                                                            |
| Independent reflections                        | 22943 [ $R_{int} = 0.0520$ , $R_{sigma} = 0.0266$ ]                                               |
| Data/restraints/parameters                     | 22943/1793/1667                                                                                   |
| Goodness-of-fit on F <sup>2</sup>              | 1.092                                                                                             |
| Final R indexes [ $I \geq 2\sigma(I)$ ]        | $R_1 = 0.0893$ , $wR_2 = 0.2304$                                                                  |
| Final R indexes [all data]                     | $R_1 = 0.0912$ , $wR_2 = 0.2313$                                                                  |
| Largest diff. peak/hole / e Å <sup>-3</sup>    | 1.40/-0.70                                                                                        |

**Table S2 Crystal data and structure refinement for SQ<sub>2</sub>Th<sub>2</sub>.**

|                                             |                                                                                                                                                                                                                                         |
|---------------------------------------------|-----------------------------------------------------------------------------------------------------------------------------------------------------------------------------------------------------------------------------------------|
| Identification code                         | SQ <sub>2</sub> Th <sub>2</sub>                                                                                                                                                                                                         |
| Empirical formula                           | C <sub>117.02</sub> H <sub>147.5</sub> B <sub>2</sub> Cl <sub>7.14</sub> N <sub>12</sub> O <sub>9.19</sub> S <sub>2</sub> Zn <sub>2</sub>                                                                                               |
| Moiety formula                              | C <sub>106</sub> H <sub>118</sub> B <sub>2</sub> N <sub>12</sub> O <sub>4</sub> S <sub>2</sub> Zn <sub>2</sub> , 3.571(CH <sub>2</sub> Cl <sub>2</sub> ),<br>3.726(C <sub>2</sub> H <sub>6</sub> O), 1.466O <sub>[H<sub>2</sub>O]</sub> |
| Formula weight                              | 2338.83                                                                                                                                                                                                                                 |
| Temperature/K                               | 100.00                                                                                                                                                                                                                                  |
| Crystal system                              | triclinic                                                                                                                                                                                                                               |
| Space group                                 | P-1                                                                                                                                                                                                                                     |
| a/Å                                         | 11.4225(3)                                                                                                                                                                                                                              |
| b/Å                                         | 14.9204(4)                                                                                                                                                                                                                              |
| c/Å                                         | 19.1678(5)                                                                                                                                                                                                                              |
| α/°                                         | 86.9480(10)                                                                                                                                                                                                                             |
| β/°                                         | 83.9220(10)                                                                                                                                                                                                                             |
| γ/°                                         | 73.1760(10)                                                                                                                                                                                                                             |
| Volume/Å <sup>3</sup>                       | 3108.46(14)                                                                                                                                                                                                                             |
| Z                                           | 1                                                                                                                                                                                                                                       |
| ρ <sub>calc</sub> /g/cm <sup>3</sup>        | 1.249                                                                                                                                                                                                                                   |
| μ/mm <sup>-1</sup>                          | 2.659                                                                                                                                                                                                                                   |
| F(000)                                      | 1231.0                                                                                                                                                                                                                                  |
| Crystal size/mm <sup>3</sup>                | 0.506 × 0.252 × 0.098                                                                                                                                                                                                                   |
| Radiation                                   | CuKα (λ = 1.54178)                                                                                                                                                                                                                      |
| 2θ range for data collection/°              | 4.638 to 160.398                                                                                                                                                                                                                        |
| Index ranges                                | -14 ≤ h ≤ 12, -19 ≤ k ≤ 19, -24 ≤ l ≤ 24                                                                                                                                                                                                |
| Reflections collected                       | 136799                                                                                                                                                                                                                                  |
| Independent reflections                     | 13426 [R <sub>int</sub> = 0.0462, R <sub>sigma</sub> = 0.0205]                                                                                                                                                                          |
| Data/restraints/parameters                  | 13426/255/793                                                                                                                                                                                                                           |
| Goodness-of-fit on F <sup>2</sup>           | 1.027                                                                                                                                                                                                                                   |
| Final R indexes [I ≥ 2σ (I)]                | R <sub>1</sub> = 0.0418, wR <sub>2</sub> = 0.1154                                                                                                                                                                                       |
| Final R indexes [all data]                  | R <sub>1</sub> = 0.0461, wR <sub>2</sub> = 0.1194                                                                                                                                                                                       |
| Largest diff. peak/hole / e Å <sup>-3</sup> | 0.71/-0.67                                                                                                                                                                                                                              |

| <b>Table S3 Crystal data and structure refinement for SQ<sub>2</sub>Th<sub>3</sub>.</b> |                                                                                                                                            |
|-----------------------------------------------------------------------------------------|--------------------------------------------------------------------------------------------------------------------------------------------|
| Identification code                                                                     | PDM3_57                                                                                                                                    |
| Empirical formula                                                                       | C <sub>116.41</sub> H <sub>126.41</sub> B <sub>2</sub> Cl <sub>19.23</sub> N <sub>12</sub> O <sub>4</sub> S <sub>3</sub> Zn <sub>2</sub>   |
| Moiety formula                                                                          | C <sub>110</sub> H <sub>120</sub> B <sub>2</sub> N <sub>12</sub> O <sub>4</sub> S <sub>3</sub> Zn <sub>2</sub> , 6.408(CHCl <sub>3</sub> ) |
| Formula weight                                                                          | 2687.68                                                                                                                                    |
| Temperature/K                                                                           | 100.00                                                                                                                                     |
| Crystal system                                                                          | triclinic                                                                                                                                  |
| Space group                                                                             | P-1                                                                                                                                        |
| a/Å                                                                                     | 13.9530(4)                                                                                                                                 |
| b/Å                                                                                     | 19.5674(5)                                                                                                                                 |
| c/Å                                                                                     | 25.3044(6)                                                                                                                                 |
| α/°                                                                                     | 73.7860(10)                                                                                                                                |
| β/°                                                                                     | 89.4140(10)                                                                                                                                |
| γ/°                                                                                     | 76.8000(10)                                                                                                                                |
| Volume/Å <sup>3</sup>                                                                   | 6448.0(3)                                                                                                                                  |
| Z                                                                                       | 2                                                                                                                                          |
| ρ <sub>calc</sub> /cm <sup>3</sup>                                                      | 1.384                                                                                                                                      |
| μ/mm <sup>-1</sup>                                                                      | 5.005                                                                                                                                      |
| F(000)                                                                                  | 2771.0                                                                                                                                     |
| Crystal size/mm <sup>3</sup>                                                            | 0.33 × 0.2 × 0.1                                                                                                                           |
| Radiation                                                                               | CuKα (λ = 1.54178)                                                                                                                         |
| 2θ range for data collection/°                                                          | 4.838 to 159.252                                                                                                                           |
| Index ranges                                                                            | -15 ≤ h ≤ 17, -24 ≤ k ≤ 24, -32 ≤ l ≤ 32                                                                                                   |
| Reflections collected                                                                   | 155286                                                                                                                                     |
| Independent reflections                                                                 | 27216 [R <sub>int</sub> = 0.0542, R <sub>sigma</sub> = 0.0345]                                                                             |
| Data/restraints/parameters                                                              | 27216/2339/1996                                                                                                                            |
| Goodness-of-fit on F <sup>2</sup>                                                       | 1.033                                                                                                                                      |
| Final R indexes [I ≥ 2σ (I)]                                                            | R <sub>1</sub> = 0.0562, wR <sub>2</sub> = 0.1486                                                                                          |
| Final R indexes [all data]                                                              | R <sub>1</sub> = 0.0639, wR <sub>2</sub> = 0.1552                                                                                          |
| Largest diff. peak/hole / e Å <sup>-3</sup>                                             | 0.80/-0.69                                                                                                                                 |

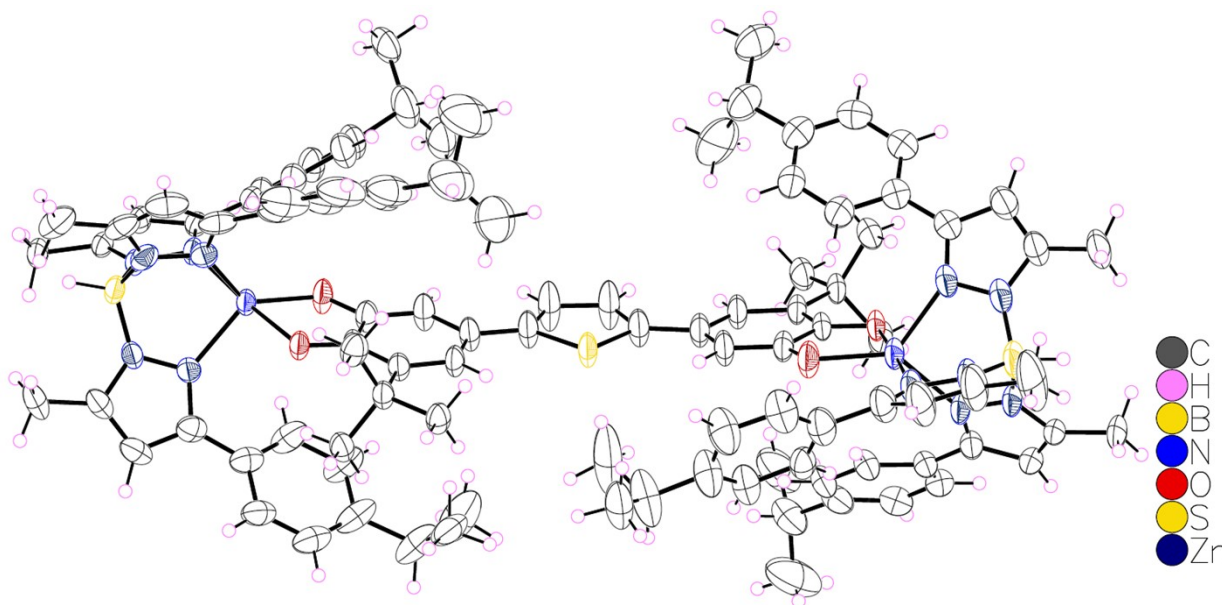

**Figure S2.** Ellipsoid plot of  $\text{SQ}_2\text{Th}$  molecule. Anisotropic displacement parameters were drawn at 50% probability level. Disordered parts and solvent molecules were omitted for clarity.

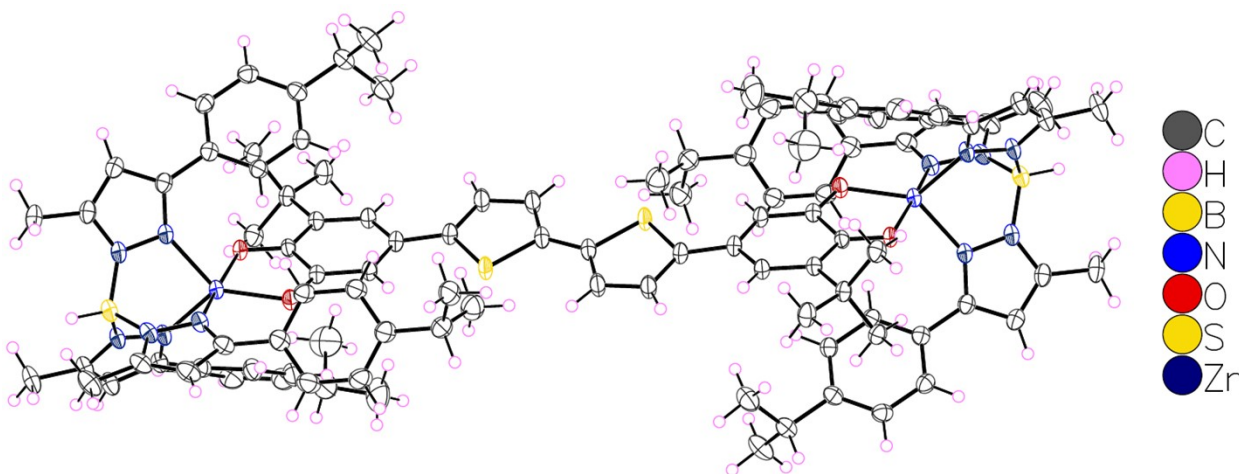

**Figure S3.** Ellipsoid plot of  $\text{SQ}_2\text{Th}_2$  molecule. Anisotropic displacement parameters were drawn at 50% probability level. Solvent molecules were omitted for clarity. The molecule is located on inversion center.

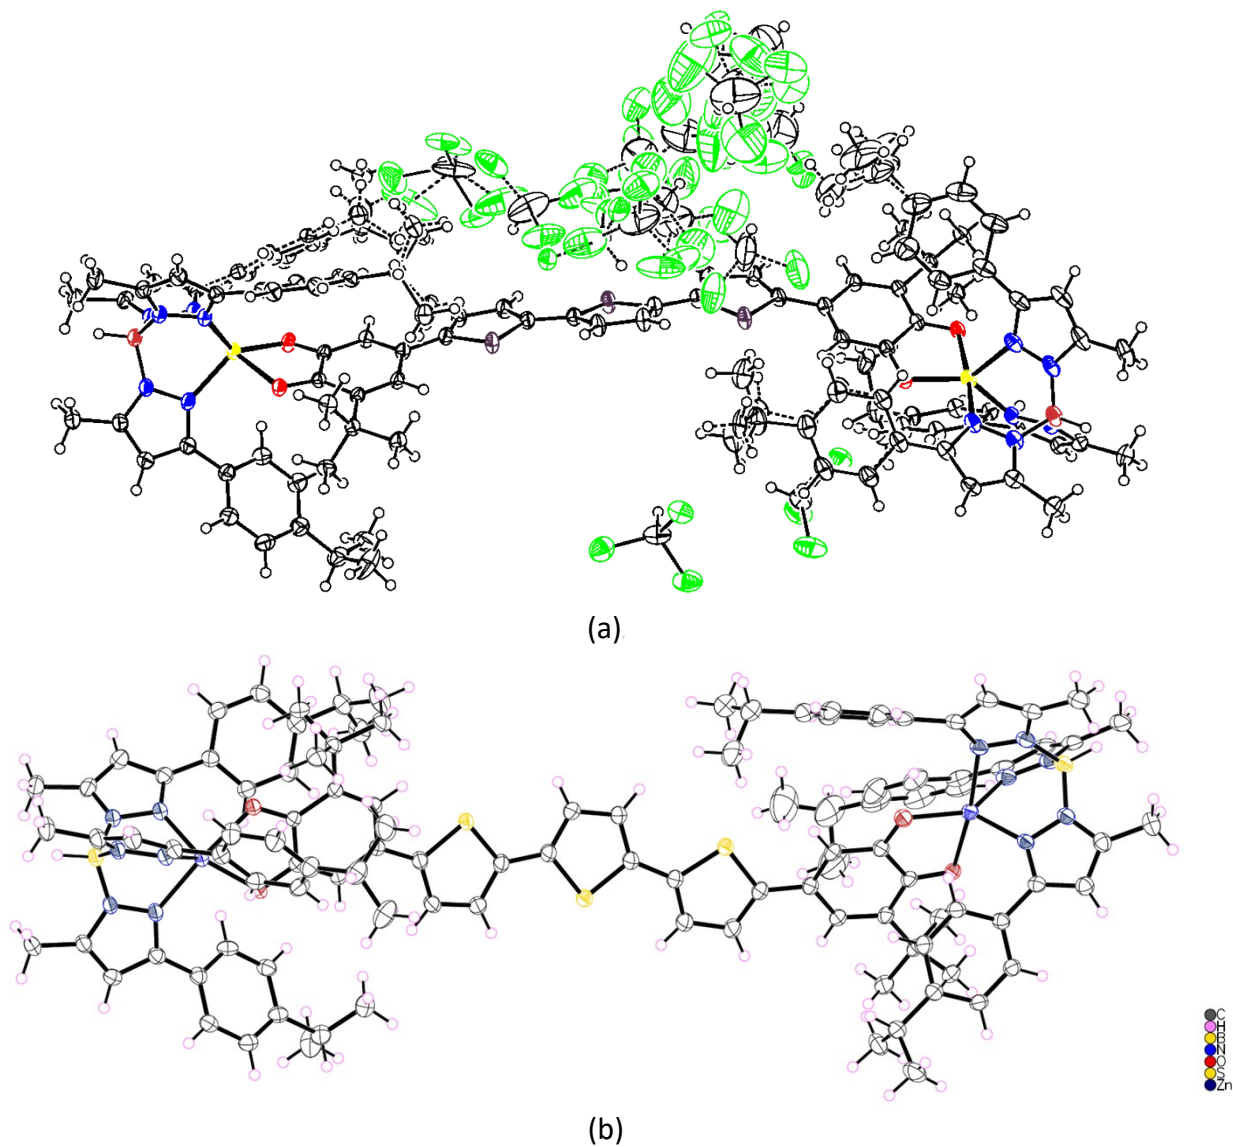

**Figure S4.** Ellipsoid plot of  $\text{SQ}_2\text{Th}_3$ . (a) Asymmetric unit, (b) Main molecule only. 2<sup>nd</sup> part of disorder was omitted for clarity. Anisotropic displacement parameters were drawn at 50% probability level.

**Table S4.** Select SQ and Th bond lengths<sup>a</sup> for **SQ-SQ** and **SQ-Th<sub>1-3</sub>-SQ**.

| Compound                    | Dioxolene Bonds     | r (Å) | Thiophene Bonds | r (Å) | Dioxolene $\Sigma\Delta_i$ (Å) <sup>b</sup> | Thiophene $\Sigma\Delta_i$ (Å) <sup>d</sup> |
|-----------------------------|---------------------|-------|-----------------|-------|---------------------------------------------|---------------------------------------------|
| <b>SQ-SQ</b>                | C1-O1               | 1.254 | ---             | ---   | 0.198                                       | ---                                         |
|                             | C2-O2               | 1.316 | ---             | ---   |                                             |                                             |
|                             | C1-C2               | 1.479 | ---             | ---   |                                             |                                             |
|                             | C2-C3               | 1.370 | ---             | ---   |                                             |                                             |
|                             | C3-C4               | 1.426 | ---             | ---   |                                             |                                             |
|                             | C4-C5               | 1.451 | ---             | ---   |                                             |                                             |
|                             | C5-C6               | 1.362 | ---             | ---   |                                             |                                             |
|                             | C6-C1               | 1.462 | ---             | ---   |                                             |                                             |
|                             | C4-C4' <sup>c</sup> | 1.421 | ---             | ---   |                                             |                                             |
| <b>SQ-Th-SQ</b>             | C1-O1               | 1.267 | C2'-C3'         | 1.418 | 0.150                                       | 0.110                                       |
|                             | C2-O2               | 1.326 | C3'-C4'         | 1.374 |                                             |                                             |
|                             | C1-C2               | 1.484 |                 |       |                                             |                                             |
|                             | C2-C3               | 1.371 |                 |       |                                             |                                             |
|                             | C3-C4               | 1.420 |                 |       |                                             |                                             |
|                             | C4-C5               | 1.441 |                 |       |                                             |                                             |
|                             | C5-C6               | 1.362 |                 |       |                                             |                                             |
|                             | C6-C1               | 1.463 |                 |       |                                             |                                             |
|                             | C4-C2'              | 1.406 |                 |       |                                             |                                             |
| <b>SQ-Th<sub>2</sub>-SQ</b> | C1-O1               | 1.266 | C2'-C3'         | 1.399 | 0.119                                       | 0.081                                       |
|                             | C2-O2               | 1.308 | C3'-C4'         | 1.389 |                                             |                                             |
|                             | C1-C2               | 1.476 | C4'-C5'         | 1.395 |                                             |                                             |
|                             | C2-C3               | 1.377 | C5'-C5''        | 1.412 |                                             |                                             |
|                             | C3-C4               | 1.404 |                 |       |                                             |                                             |
|                             | C4-C5               | 1.438 |                 |       |                                             |                                             |
|                             | C5-C6               | 1.368 |                 |       |                                             |                                             |
|                             | C6-C1               | 1.452 |                 |       |                                             |                                             |
|                             | C4-C2'              | 1.422 |                 |       |                                             |                                             |
| <b>SQ-Th<sub>3</sub>-SQ</b> | C1-O1               | 1.268 | C2'-C3'         | 1.383 | 0.080                                       | 0.026                                       |
|                             | C2-O2               | 1.298 | C3'-C4'         | 1.402 |                                             |                                             |
|                             | C1-C2               | 1.476 | C4'-C5'         | 1.378 |                                             |                                             |
|                             | C2-C3               | 1.392 | C5'-C2''        | 1.443 |                                             |                                             |
|                             | C3-C4               | 1.389 | C2''-C3''       | 1.375 |                                             |                                             |
|                             | C4-C5               | 1.436 | C3''-C4''       | 1.408 |                                             |                                             |
|                             | C5-C6               | 1.368 |                 |       |                                             |                                             |
|                             | C6-C1               | 1.452 |                 |       |                                             |                                             |
|                             | C4-C2'              | 1.443 |                 |       |                                             |                                             |

<sup>a</sup>Average values where applicable, see Fig. 2 (in text) for numbering scheme. <sup>b</sup>Bond deviation parameter,  $\Sigma\Delta_i$  = sum of absolute value of difference in dioxolene bond lengths compared to those of 3,5-di-*tert*-butylsemiquinone.<sup>13</sup> See text for details. <sup>c</sup>Here, C4-C4' refers to the covalent bond that connects the dioxolene rings. Bond deviation parameters for thiophene bridges determined by comparing the bridges of SQ<sub>2</sub>Th, SQ<sub>2</sub>Th<sub>2</sub>, and SQ<sub>2</sub>Th<sub>3</sub> to 2,5-diphenyl-thiophene,<sup>14</sup> 5,5'-diphenyl-2,2'-bithiophene,<sup>15</sup> and 3',4'-dibutyl-5,5''-diphenyl-2,2':5',2''-terthiophene,<sup>16</sup> respectively.<sup>d</sup>

## Comparison of SQ<sub>2</sub>Th and SQ<sub>2</sub>Th<sub>2</sub> <sup>1</sup>H-NMR spectra

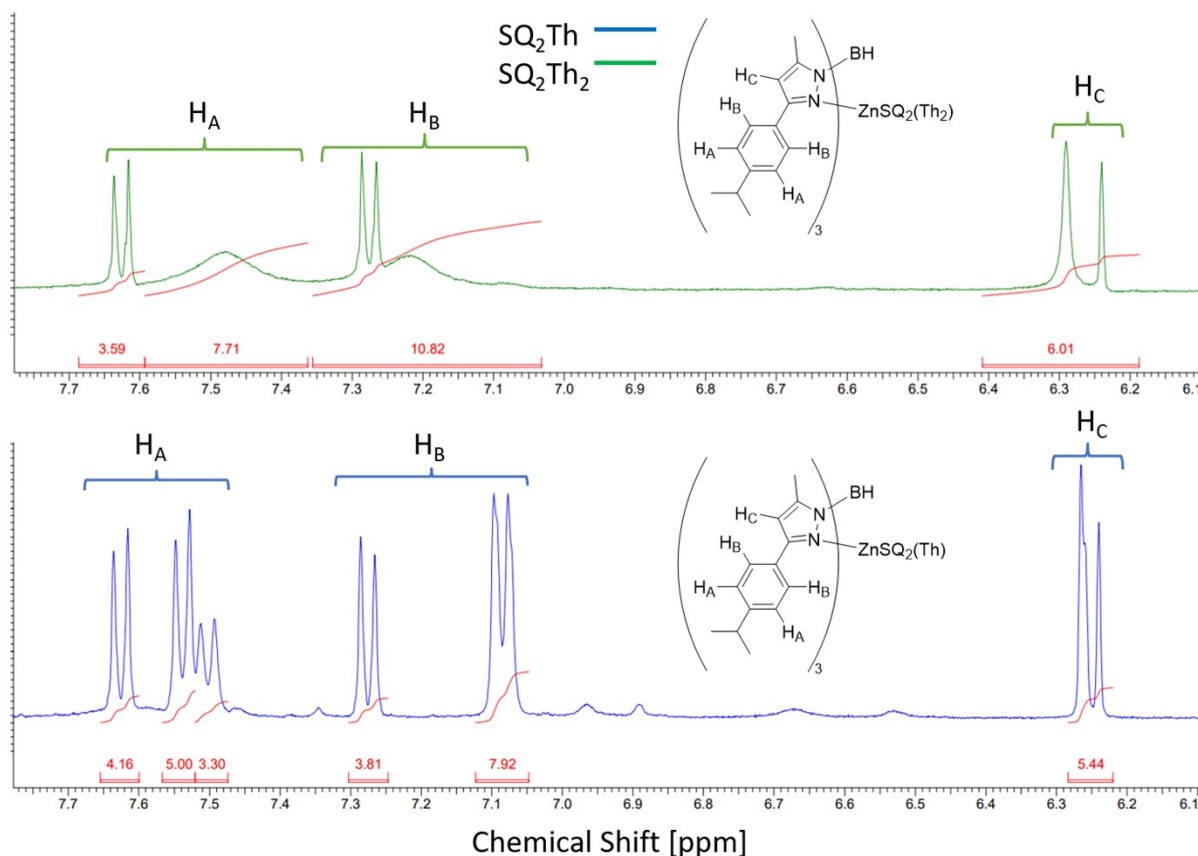

**Figure S5.** Aromatic regions of the <sup>1</sup>H-NMR spectra of SQ<sub>2</sub>Th and SQ<sub>2</sub>Th<sub>2</sub> in CD<sub>2</sub>Cl<sub>2</sub>. Assignments were made by comparing to previously published data on Cum<sub>3</sub>MeTpZn(OH).<sup>17</sup> SQ<sub>2</sub>Th has pronounced aromatic peaks at 7.62 (d; 4 H), 7.54 (d; 5 H), 7.50 (d; 3 H), 7.27 (d; 4 H), 7.08 (d; 8 H) and 6.27 (s; 4 H), 6.24 (s; 2 H). There are a few, broadened signals at 6.96, 6.89, 6.67, and 6.53 ppm that may correspond to different conformers of the thiophene ring relative to Cum<sub>3</sub>MeTpZnSQ, but otherwise were not identified here. Broadening could be due to the perturbation of the aromaticity by the semiquinone radicals. Notably in the crystal structure shown in **Figure S1**, all of the cumenyl protons in SQ<sub>2</sub>Th are roughly 2.5–6 Å away from the semiquinones (in solution free rotation will allow all protons closer proximity) and in relatively close contact with this moiety while the pyrazole protons are all facing away from the semiquinones and 6–7 Å away. If there were substantial degrees of paramagnetism in SQ<sub>2</sub>Th, it would be expected for NMR signal dampening to occur for the cumenyl protons substantially and minimally for the pyrazole protons, which there is not for SQ<sub>2</sub>Th.<sup>18, 19</sup> So when analyzing the <sup>1</sup>H-NMR spectra of SQ<sub>2</sub>Th<sub>2</sub>, there are two broad signals at 7.48 and 7.28 ppm that have been assigned to the cumenyl protons and 2 singlet peaks at 6.29 and 6.24 ppm for the pyrazole protons. These broad signals are indicative of paramagnetic signal dampening due to the open shell nature of SQ<sub>2</sub>Th<sub>2</sub> at room temperature. Peaks displaying no paramagnetic broadening for H<sub>A</sub> and H<sub>B</sub> is likely due to differing conformations that enable the cumenyl groups to be farther away from the semiquinone radical.

## REFERENCES

1. Hewitt, P.; Shultz, D. A.; Kirk, M. L., Rules for Magnetic Exchange in Azulene-Bridged Biradicals: quo vadis? *J. Org. Chem.* **2021**, *86*, 15577–15587.
2. Ruf, M.; Vahrenkamp, H., Small Molecule Chemistry of the Pyrazolylborate—Zinc Unit  $\text{Tp}^{\text{Cum,Me}}\text{Zn}$ . *Inorg. Chem.* **1996**, *35*, 6571–6578.
3. Stoll, S.; Schweiger, A., EasySpin, a comprehensive software package for spectral simulation and analysis in EPR. *J. Magn. Reson.* **2006**, *178*, 42–55.
4. Shultz, D. A.; Fico, R. M., Jr.; Bodnar, S. H.; Kumar, R. K.; Vostrikova, K. E.; Kampf, J. W.; Boyle, P. D., Trends in Exchange Coupling for Trimethylenemethane-Type Bis(Semiquinone) Biradicals and Correlation of Magnetic Exchange with Mixed Valency for Cross-Conjugated Systems. *J. Am. Chem. Soc.* **2003**, *125*, 11761.
5. Kang, B.; Kurutz, J. W.; Youm, K.-T.; Totten, R. K.; Hupp, J. T.; Nguyen, S. T., Catalytically active supramolecular porphyrin boxes: acceleration of the methanolysis of phosphate triesters via a combination of increased local nucleophilicity and reactant encapsulation. *Chem. Sci.* **2012**, *3*, 1938–1944.
6. Bruker APEX4, Bruker AXS LLC: Madison, Wisconsin, USA, 2021.
7. Bruker SAINT V8.40B, Bruker AXS LLC: Madison, Wisconsin, USA.
8. Krause, L.; Herbst-Irmer, R.; Sheldrick, G. M.; Stalke, D., Comparison of silver and molybdenum microfocus X-ray sources for single-crystal structure determination. *J. Appl. Cryst.* **2015**, *48*, 3–10.
9. Sheldrick, G. M., SHELXT - Integrated space-group and crystal-structure determination. *Acta Cryst.* **2015**, *A71*, 3–8.
10. Sheldrick, G. M., Crystal structure refinement with SHELXL. *Acta Cryst.* **2015**, *C71*, 3–8.
11. Dolomanov, O. V.; Bourhis, L. J.; Gildea, R. J.; Howard, J. A. K.; Puschmann, H., OLEX2: A complete structure solution, refinement and analysis program. *J. Appl. Cryst.* **2009**, *42*, 339–341.
12. Spek, A. L., The Program PLATON is designed as a Multipurpose Crystallographic Tool, 1980–2021. *Acta Cryst.* **2020**, *E76*, 1–11.
13. Bodnar, S. H.; Caneschi, A.; Dei, A.; Shultz, D. A.; Sorace, L., A bis-bidentate dioxolene ligand induces thermal hysteresis in valence tautomerism interconversion processes. *Chem. Commun.* **2001**, 2150–2151.
14. Pouzet, P.; Erdelmeier, I.; Ginderow, D.; Dansette, P. M.; Mansuy, D.; Mornon, J.-P., Comparison of the Crystal Structures and Thiophene Ring Aromaticity of 2,5-Diphenylthiophene, Its Sulfoxide and Sulfone. *J. Heterocycl. Chem.* **1997**, *34*, 1567–1574.
15. Akai, R.; Oka, K.; Nishida, R.; Tohnai, N., Systematic Arrangement Control of Functional Organic Molecules. *CrystEngComm* **2022**, *24*, 4180–4186.
16. Graf, D. D.; Duan, R. G.; Campbell, J. P.; Miller, L. L.; Mann, K. R., From Monomers to p-Stacks. A Comprehensive Study of the Structure and Properties of Monomeric, p-Dimerized, and p-Stacked Forms of the Cation Radical of 3',4'-Dibutyl-2,5''-diphenyl-2,2':5',2''-terthiophene. *J. Am. Chem. Soc.* **1997**, *119*, 5888–5899.
17. Ruf, M.; Weis, K.; Vahrenkamp, H., A New Pyrazolylborate Zinc Hydroxide Complex Capable of Cleaving Esters, Amides and Phosphates. *J. Chem. Soc., Chem. Commun.* **1994**, 135–136.
18. Rogawski, R.; Sergeyev, I. V.; Zhang, Y.; Tran, T. H.; Li, Y.; Tong, L.; McDermott, A. E., NMR Signal Quenching from Bound Biradical Affinity Reagents in DNP Samples. *J. Phys. Chem. B* **2017**, *121*, 10770–10781.
19. Softley, C. A.; Bostock, M. J.; Popowicz, G. M.; Sattler, M., Paramagnetic NMR in Drug Discovery. *J. Biomol. NMR* **2020**, *74*, 287–309.
